# Supplementary material for: Highly biosafe biomimetic stem cell membrane-disguised nanovehicles for cartilage regeneration
Source: Royal Society of Chemistry journal article supplement (doi:10.1039/d0tb01686a), 2020-01-01
Supplement: d0tb01686a1.pdf [file d0tb01686a1.pdf]

Electronic Supplementary Information

Highly biosafe biomimetic stem cell membrane-disguised nanovehicles for cartilage regeneration

Xingyu Zhang<sup>1</sup>#, Jun Chen<sup>1</sup>#, Qin Jiang<sup>2</sup>, Xiaoquan Ding<sup>1</sup>, Yunxia Li<sup>1</sup>, Chen Chen<sup>3</sup>, Wuli Yang<sup>2</sup>,  
and Shiyi Chen<sup>1</sup>\*

<sup>1</sup> Department of Sports Medicine, Huashan Hospital, Fudan University, Shanghai 200040, China

<sup>2</sup> State Key Laboratory of Molecular Engineering of Polymers & Department of Macromolecular  
Science, Fudan University, Shanghai 200433, China

<sup>3</sup> Department of Sports Medicine, Shanghai Sixth People's Hospital, Shanghai Jiao Tong  
University, Shanghai 200233, China

# Xingyu Zhang and Jun Chen contributed equally to this work.

\* Corresponding author: Shiyi Chen (E-mail: [cshiyi@163.com](mailto:cshiyi@163.com)).

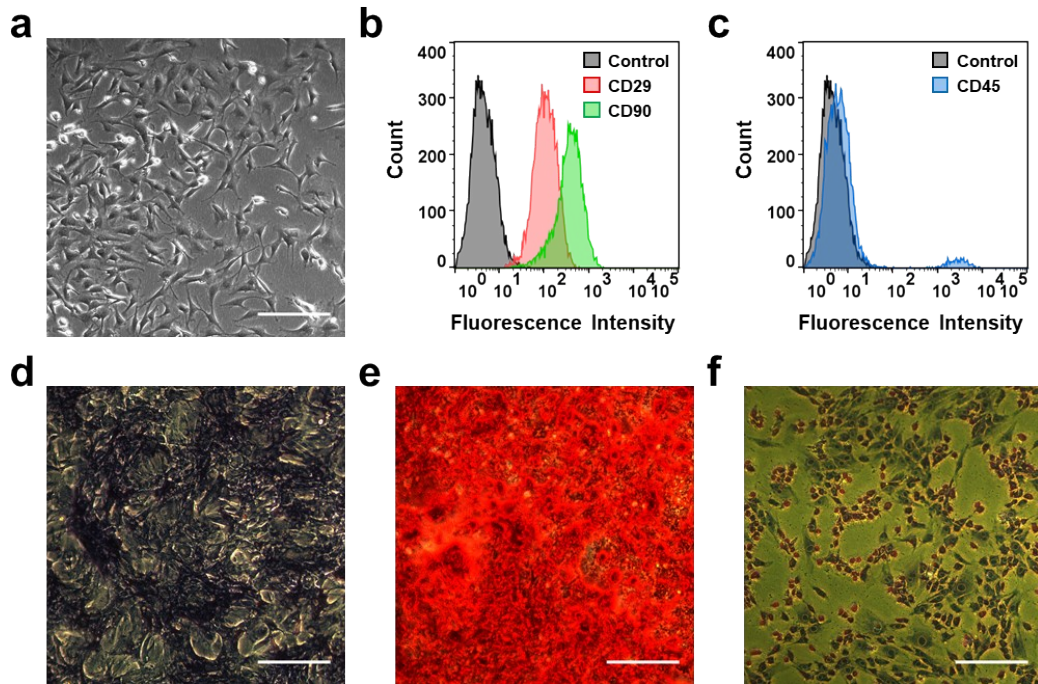

Fig. S1. The characterization of the isolated BMSCs (scale bars, 200  $\mu$ m). (a) Passage 2 generation of BMSCs isolated from the femurs and tibias of a skeletally mature Sprague-Dawley rat. (b, c) Flow cytometry analysis for the positively expressed (CD29 and CD90, b) and negatively expressed (CD45, c) membrane markers of BMSCs. (d) Alkaline phosphatase staining of BMSCs under osteogenic induction for 14 d. (e) Alizarin red staining of BMSCs under osteogenic induction for 21 d. (f) Toluidine blue staining of BMSCs under chondrogenic induction for 28 d.

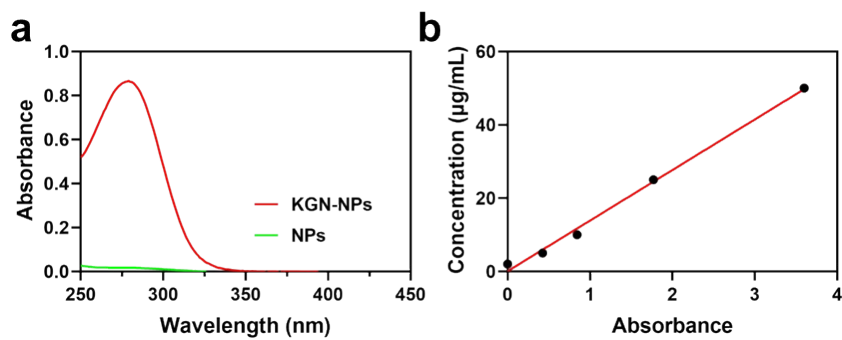

Fig. S2. The characterization of KGN loading and releasing of KGN-NPs. (a) The comparison of UV-vis absorption spectra between the dialysis solutions of NPs and KGN-NPs. (b) The linear regression between KGN concentration and UV-vis absorbance.

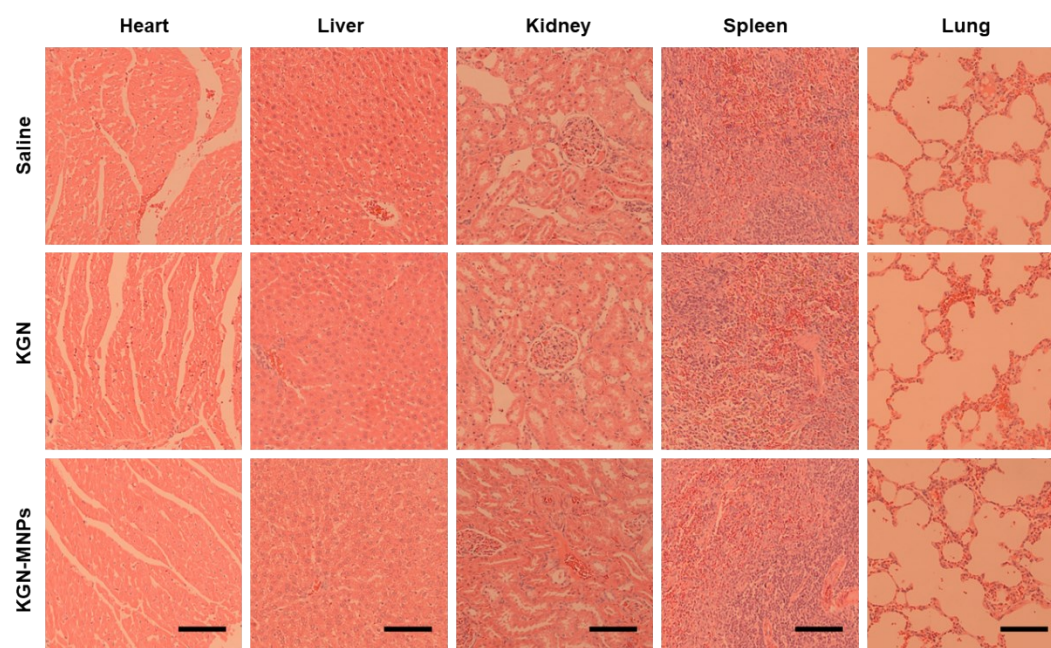

Fig. S3. *In vivo* biosafety evaluation of major organs of heart, liver, kidney, spleen and lung resolved by H&E staining (scale bars, 100  $\mu$ m).

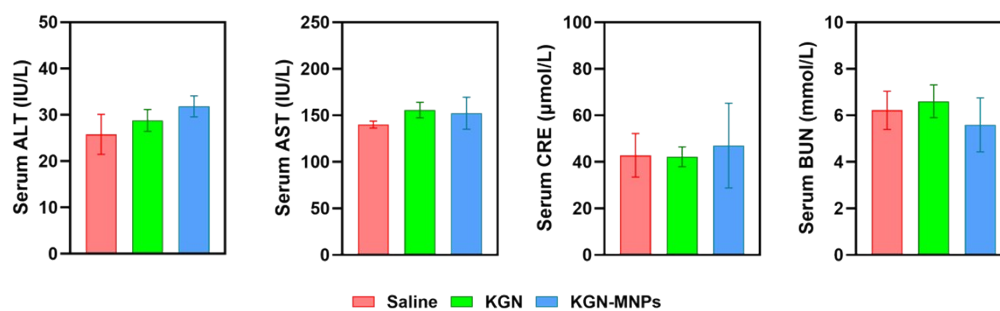

Fig. S4. Serum biochemical functional indicators of ALT, AST, CRE and BUN for systemic biosafety analysis. Data were presented as mean  $\pm$  S.D. In all datasets, n = 6 independent experiments were performed.
